# Supplementary material for: Identification of QTL with large effect on seed weight in a selective population of soybean with genome-wide association and fixation index analyses
Source: BMC Genomics. 2017 Jul 12;18:529. doi: 10.1186/s12864-017-3922-0 (PMC5508781; doi:10.1186/s12864-017-3922-0)
Supplement: Supplementary file 7 — Loci with Fst value >0.557 between the large and small seed weight populations across the soybean genome. (XLSX 24 kb) [file 12864_2017_3922_MOESM7_ESM.xlsx]

## Sheet: Additional file 7 Table S3
Additional file 7: Table S3. Loci with Fst value > 0.557 between the large and small seed weight populations across the soybean genome
ss ID	SNP ID	Chromosome	Coordinate	Fst	Genomic Region
715579502	BARC_1.01_Gm01_44443891_A_G	Chr01	45309459	0.578859	Het
715579894	BARC_1.01_Gm01_48723511_C_T	Chr01	49603884	0.581781	Eu
715579895	BARC_1.01_Gm01_48724888_T_C	Chr01	49605261	0.587672	Eu
715579896	BARC_1.01_Gm01_48726791_G_T	Chr01	49607164	0.59055	Eu
715579898	BARC_1.01_Gm01_48730393_C_T	Chr01	49610766	0.578105	Eu
715583699	BARC_1.01_Gm02_6026609_T_C	Chr02	6085678	0.640699	Eu
715583700	BARC_1.01_Gm02_6029356_T_C	Chr02	6088503	0.640699	Eu
715583703	BARC_1.01_Gm02_6125494_A_G	Chr02	6198717	0.597055	Eu
715582659	BARC_1.01_Gm02_43922640_C_A	Chr02	40846146	0.593571	Eu
715585727	BARC_1.01_Gm03_38448001_C_T	Chr03	36427644	0.63185	Eu
715586178	BARC_1.01_Gm03_42926505_T_C	Chr03	40913421	0.55997	Eu
715586183	BARC_1.01_Gm03_42951250_C_T	Chr03	40938166	0.583292	Eu
715586185	BARC_1.01_Gm03_42959913_G_A	Chr03	40946829	0.619178	Eu
715586192	BARC_1.01_Gm03_43015915_A_G	Chr03	41002811	0.569235	Eu
715587150	BARC_1.01_Gm04_14257302_T_G	Chr04	15277068	0.590537	Het
715587168	BARC_1.01_Gm04_14778567_A_C	Chr04	15806228	0.600931	Het
715587230	BARC_1.01_Gm04_16999532_T_C	Chr04	18023776	0.696928	Het
715587244	BARC_1.01_Gm04_17387891_T_C	Chr04	18416212	0.676607	Het
715587250	BARC_1.01_Gm04_17580500_T_C	Chr04	18730673	0.678345	Het
715587251	BARC_1.01_Gm04_17624712_T_C	Chr04	18774963	0.678345	Het
715587256	BARC_1.01_Gm04_17773168_A_G	Chr04	18924038	0.656931	Het
715587258	BARC_1.01_Gm04_17801084_T_G	Chr04	18951954	0.671847	Het
715587262	BARC_1.01_Gm04_17898943_T_C	Chr04	19049717	0.659916	Het
715587263	BARC_1.01_Gm04_17925904_A_G	Chr04	19076840	0.634418	Het
715587266	BARC_1.01_Gm04_18000454_A_C	Chr04	19151390	0.641994	Het
715587271	BARC_1.01_Gm04_18147043_T_C	Chr04	19298012	0.634049	Het
715587276	BARC_1.01_Gm04_18284682_T_C	Chr04	19435666	0.633708	Het
715587306	BARC_1.01_Gm04_19107515_A_G	Chr04	20263553	0.649954	Het
715587741	BARC_1.01_Gm04_33749217_A_G	Chr04	20718762	0.702395	Het
715587730	BARC_1.01_Gm04_33477361_A_G	Chr04	21006592	0.669121	Het
715587718	BARC_1.01_Gm04_33086652_A_C	Chr04	21391395	0.670005	Het
715587714	BARC_1.01_Gm04_32962504_T_C	Chr04	21515541	0.674664	Het
715587709	BARC_1.01_Gm04_32866553_A_G	Chr04	21610002	0.678317	Het
715587706	BARC_1.01_Gm04_32800373_C_T	Chr04	21676235	0.672841	Het
715587684	BARC_1.01_Gm04_32065239_T_C	Chr04	22411225	0.672841	Het
715587682	BARC_1.01_Gm04_32012103_T_C	Chr04	22464360	0.672841	Het
715587680	BARC_1.01_Gm04_31959712_A_C	Chr04	22524587	0.655036	Het
715587678	BARC_1.01_Gm04_31931154_T_G	Chr04	22553145	0.66896	Het
715587667	BARC_1.01_Gm04_31563467_T_C	Chr04	22916345	0.683143	Het
715587665	BARC_1.01_Gm04_31436577_C_A	Chr04	23026281	0.674664	Het
715587660	BARC_1.01_Gm04_31314192_T_C	Chr04	23145341	0.672841	Het
715587658	BARC_1.01_Gm04_31267511_G_A	Chr04	23191315	0.671847	Het
715587657	BARC_1.01_Gm04_31211384_C_T	Chr04	23247415	0.670005	Het
715587653	BARC_1.01_Gm04_31038638_T_C	Chr04	23445592	0.674664	Het
715587650	BARC_1.01_Gm04_30926129_G_A	Chr04	23566497	0.672841	Het
715587646	BARC_1.01_Gm04_30800512_G_A	Chr04	23691744	0.670005	Het
715587641	BARC_1.01_Gm04_30739677_A_G	Chr04	23752577	0.672841	Het
715587638	BARC_1.01_Gm04_30652083_C_A	Chr04	23840197	0.672841	Het
715587634	BARC_1.01_Gm04_30543000_T_C	Chr04	23949282	0.672841	Het
715587632	BARC_1.01_Gm04_30457043_A_G	Chr04	24031396	0.671847	Het
715587631	BARC_1.01_Gm04_30420092_A_G	Chr04	24068347	0.672841	Het
715587624	BARC_1.01_Gm04_30188045_T_C	Chr04	24300386	0.667098	Het
715587617	BARC_1.01_Gm04_29881491_A_C	Chr04	24591046	0.674664	Het
715587614	BARC_1.01_Gm04_29745903_T_C	Chr04	24725515	0.674664	Het
715587611	BARC_1.01_Gm04_29672471_A_G	Chr04	24798946	0.684024	Het
715611694	BARC_1.01_Gm12_18062812_A_G	Chr04	24971674	0.670994	Het
715630021	BARC_1.01_Gm18_24826260_A_G	Chr04	25294058	0.672841	Het
715630022	BARC_1.01_Gm18_24868751_C_A	Chr04	25336293	0.670005	Het
715630030	BARC_1.01_Gm18_25169738_G_A	Chr04	25618510	0.697315	Het
715630034	BARC_1.01_Gm18_25293294_A_G	Chr04	25742038	0.675611	Het
715630041	BARC_1.01_Gm18_25727132_C_T	Chr04	26106982	0.671847	Het
715630044	BARC_1.01_Gm18_25761403_G_A	Chr04	26141253	0.672841	Het
715630045	BARC_1.01_Gm18_25794373_T_C	Chr04	26174222	0.702395	Het
715587360	BARC_1.01_Gm04_20856983_T_C	Chr04	30187490	0.559486	Het
715587357	BARC_1.01_Gm04_20796034_A_G	Chr04	30248413	0.559486	Het
715587354	BARC_1.01_Gm04_20729591_G_A	Chr04	30314753	0.568643	Het
715587338	BARC_1.01_Gm04_20426164_T_C	Chr04	30626979	0.562724	Het
715587337	BARC_1.01_Gm04_20336481_T_C	Chr04	30724329	0.562333	Het
715587326	BARC_1.01_Gm04_19903602_A_G	Chr04	31165753	0.562724	Het
715587428	BARC_1.01_Gm04_23132742_T_C	Chr04	31601236	0.562724	Het
715587431	BARC_1.01_Gm04_23251720_T_C	Chr04	31715861	0.559486	Het
715587463	BARC_1.01_Gm04_24276060_G_T	Chr04	32782075	0.57193	Het
715587475	BARC_1.01_Gm04_24888097_C_A	Chr04	33376999	0.568079	Het
715587487	BARC_1.01_Gm04_25230364_T_C	Chr04	33719401	0.562724	Het
715587523	BARC_1.01_Gm04_26520135_C_A	Chr04	35006185	0.559486	Het
715587524	BARC_1.01_Gm04_26558203_A_G	Chr04	35045798	0.562724	Het
715587534	BARC_1.01_Gm04_26886535_T_C	Chr04	35367477	0.559486	Het
715587556	BARC_1.01_Gm04_27781275_T_C	Chr04	36245625	0.562724	Het
715587560	BARC_1.01_Gm04_27912357_T_C	Chr04	36376946	0.602444	Het
715587563	BARC_1.01_Gm04_28018833_G_A	Chr04	36480919	0.559486	Het
715587578	BARC_1.01_Gm04_28481584_T_C	Chr04	36944047	0.571412	Het
715587808	BARC_1.01_Gm04_35879410_T_C	Chr04	39006019	0.599397	Het
715587823	BARC_1.01_Gm04_36357346_T_C	Chr04	39484148	0.599397	Het
715587830	BARC_1.01_Gm04_36493206_A_G	Chr04	39620076	0.605766	Het
715587831	BARC_1.01_Gm04_36529082_A_G	Chr04	39655962	0.604801	Het
715587832	BARC_1.01_Gm04_36559415_T_C	Chr04	39686301	0.580267	Het
715587834	BARC_1.01_Gm04_36604337_A_G	Chr04	39731223	0.601884	Het
715587840	BARC_1.01_Gm04_36749962_A_C	Chr04	39885590	0.595653	Het
715587852	BARC_1.01_Gm04_37010886_T_C	Chr04	40151473	0.648839	Het
715587856	BARC_1.01_Gm04_37078558_G_A	Chr04	40218961	0.628973	Het
715587867	BARC_1.01_Gm04_37448392_G_A	Chr04	40597994	0.579026	Het
715587868	BARC_1.01_Gm04_37474521_G_T	Chr04	40624123	0.582429	Het
715587873	BARC_1.01_Gm04_37615477_A_G	Chr04	40765058	0.578188	Het
715587874	BARC_1.01_Gm04_37645341_G_A	Chr04	40794922	0.582429	Het
715588214	BARC_1.01_Gm04_42290567_T_C	Chr04	45435298	0.560951	Eu
715594415	BARC_1.01_Gm06_41590461_A_G	Chr06	42307699	0.637949	Het
715594425	BARC_1.01_Gm06_42137910_A_G	Chr06	42879612	0.628975	Het
715594428	BARC_1.01_Gm06_42308631_A_C	Chr06	43064582	0.635811	Het
715594433	BARC_1.01_Gm06_42515359_A_G	Chr06	43269264	0.637949	Het
715594437	BARC_1.01_Gm06_42627672_A_G	Chr06	43381556	0.637949	Het
715594439	BARC_1.01_Gm06_42674979_T_G	Chr06	43428865	0.654413	Het
715594440	BARC_1.01_Gm06_42707931_T_G	Chr06	43461818	0.625123	Het
715594441	BARC_1.01_Gm06_42736105_A_G	Chr06	43490115	0.635811	Het
715594447	BARC_1.01_Gm06_42964401_T_C	Chr06	43725350	0.64897	Het
715594459	BARC_1.01_Gm06_43235059_C_T	Chr06	43996760	0.589187	Het
715594897	BARC_1.01_Gm06_47843257_G_T	Chr06	48464349	0.625407	Eu
715594898	BARC_1.01_Gm06_47844958_G_T	Chr06	48466050	0.559486	Eu
715595216	BARC_1.01_Gm06_49925739_C_T	Chr06	50599016	0.62807	Eu
715598370	BARC_1.01_Gm07_559411_A_G	Chr07	564445	0.565129	Eu
715598455	BARC_1.01_Gm07_620108_C_T	Chr07	625141	0.592225	Eu
715598512	BARC_1.01_Gm07_659358_T_G	Chr07	664201	0.591271	Eu
715599042	BARC_1.01_Gm07_944506_C_T	Chr07	947664	0.637904	Eu
715595798	BARC_1.01_Gm07_1076879_C_T	Chr07	1079436	0.683154	Eu
715595808	BARC_1.01_Gm07_1085650_G_A	Chr07	1088213	0.685408	Eu
715595992	BARC_1.01_Gm07_1295060_G_A	Chr07	1297229	0.639136	Eu
715596036	BARC_1.01_Gm07_1336323_A_G	Chr07	1338493	0.594407	Eu
715596226	BARC_1.01_Gm07_1441759_A_C	Chr07	1443929	0.633823	Eu
715596399	BARC_1.01_Gm07_1534291_G_A	Chr07	1536458	0.679086	Eu
715596466	BARC_1.01_Gm07_1574673_G_A	Chr07	1576838	0.631578	Eu
715596499	BARC_1.01_Gm07_1598052_G_A	Chr07	1600217	0.594407	Eu
715596538	BARC_1.01_Gm07_1626681_A_C	Chr07	1628847	0.634569	Eu
715596541	BARC_1.01_Gm07_1630335_G_A	Chr07	1632501	0.637433	Eu
715596617	BARC_1.01_Gm07_1695872_T_C	Chr07	1698022	0.561838	Eu
715596670	BARC_1.01_Gm07_1749529_T_C	Chr07	1751679	0.565971	Eu
715596844	BARC_1.01_Gm07_2341725_A_G	Chr07	2361566	0.612385	Eu
715596849	BARC_1.01_Gm07_2361283_T_C	Chr07	2381124	0.625501	Eu
715596861	BARC_1.01_Gm07_2418465_A_G	Chr07	2438308	0.6505	Eu
715596864	BARC_1.01_Gm07_2423837_T_C	Chr07	2443680	0.630198	Eu
715596871	BARC_1.01_Gm07_2444385_A_G	Chr07	2464228	0.645129	Eu
715596872	BARC_1.01_Gm07_2445508_C_T	Chr07	2465351	0.647398	Eu
715596873	BARC_1.01_Gm07_2449876_A_G	Chr07	2469719	0.658094	Eu
715596874	BARC_1.01_Gm07_2458124_A_G	Chr07	2477967	0.581794	Eu
715596877	BARC_1.01_Gm07_2471949_C_T	Chr07	2491792	0.647398	Eu
715596890	BARC_1.01_Gm07_2501663_G_A	Chr07	2521516	0.596028	Eu
715596892	BARC_1.01_Gm07_2502897_C_T	Chr07	2522750	0.596028	Eu
715596961	BARC_1.01_Gm07_2710589_G_T	Chr07	2730460	0.568767	Eu
715597105	BARC_1.01_Gm07_3084403_T_C	Chr07	3104282	0.558263	Eu
715597117	BARC_1.01_Gm07_3107698_A_G	Chr07	3127577	0.558263	Eu
715598534	BARC_1.01_Gm07_6781309_T_C	Chr07	6819959	0.560951	Eu
715596479	BARC_1.01_Gm07_15832426_T_C	Chr07	15919460	0.570036	Eu
715596521	BARC_1.01_Gm07_16081315_T_G	Chr07	16172077	0.581871	Eu
715600043	BARC_1.01_Gm08_18319356_G_A	Chr08	18254279	0.66896	Eu
715601904	BARC_1.01_Gm08_41254477_G_T	Chr08	41896685	0.572601	Eu
715604911	BARC_1.01_Gm09_45482083_C_T	Chr09	48680356	0.692562	Eu
715604912	BARC_1.01_Gm09_45516533_A_G	Chr09	48714806	0.699652	Eu
715604990	BARC_1.01_Gm09_46185347_C_T	Chr09	49388767	0.597329	Eu
715604991	BARC_1.01_Gm09_46198095_A_G	Chr09	49401516	0.589163	Eu
715604992	BARC_1.01_Gm09_46202748_T_C	Chr09	49406169	0.604811	Eu
715604993	BARC_1.01_Gm09_46208079_A_G	Chr09	49411500	0.591338	Eu
715604995	BARC_1.01_Gm09_46219734_A_C	Chr09	49423155	0.591338	Eu
715605011	BARC_1.01_Gm09_46356438_G_A	Chr09	49559911	0.566515	Eu
715605019	BARC_1.01_Gm09_46448650_G_T	Chr09	49652843	0.566515	Eu
715607735	BARC_1.01_Gm10_47377738_C_T	Chr10	47973308	0.587672	Eu
715607931	BARC_1.01_Gm10_48515088_A_G	Chr10	49110777	0.59029	Eu
715607933	BARC_1.01_Gm10_48577961_C_T	Chr10	49173650	0.627675	Eu
715607934	BARC_1.01_Gm10_48578360_A_G	Chr10	49174049	0.627675	Eu
715608796	BARC_1.01_Gm11_1088795_G_T	Chr11	1097745	0.57518	Eu
715610710	BARC_1.01_Gm11_4312262_G_A	Chr11	4321689	0.568311	Eu
715610711	BARC_1.01_Gm11_4316001_A_G	Chr11	4325428	0.560151	Eu
715610713	BARC_1.01_Gm11_4321052_T_G	Chr11	4330479	0.564484	Eu
715610714	BARC_1.01_Gm11_4328571_T_C	Chr11	4337998	0.560151	Eu
715610716	BARC_1.01_Gm11_4328900_C_T	Chr11	4338327	0.583579	Eu
715610717	BARC_1.01_Gm11_4329480_T_C	Chr11	4338907	0.564988	Eu
715610718	BARC_1.01_Gm11_4329662_G_A	Chr11	4339089	0.580069	Eu
715610723	BARC_1.01_Gm11_4408645_C_T	Chr11	4418072	0.604313	Eu
715610745	BARC_1.01_Gm11_4566780_C_T	Chr11	4576207	0.604313	Eu
715610746	BARC_1.01_Gm11_4576242_C_A	Chr11	4585669	0.597906	Eu
715610747	BARC_1.01_Gm11_4577509_G_A	Chr11	4586936	0.601146	Eu
715618252	BARC_1.01_Gm14_303453_A_C	Chr14	309966	0.627514	Eu
715619712	BARC_1.01_Gm14_587754_T_C	Chr14	594215	0.581152	Eu
715619948	BARC_1.01_Gm14_803109_A_G	Chr14	804855	0.574454	Eu
715620072	BARC_1.01_Gm14_915942_G_T	Chr14	917694	0.590715	Eu
715620077	BARC_1.01_Gm14_923444_G_A	Chr14	925196	0.588044	Eu
715620131	BARC_1.01_Gm14_972283_T_C	Chr14	974027	0.604404	Eu
715620145	BARC_1.01_Gm14_987327_G_T	Chr14	989145	0.631274	Eu
715618424	BARC_1.01_Gm14_34265654_T_C	Chr14	17442487	0.55997	Het
715618174	BARC_1.01_Gm14_28004374_T_C	Chr14	32173175	0.608428	Het
715618180	BARC_1.01_Gm14_28158698_T_C	Chr14	32327489	0.60741	Het
715618182	BARC_1.01_Gm14_28232445_T_C	Chr14	32401375	0.56388	Het
715618189	BARC_1.01_Gm14_28361034_A_G	Chr14	32529543	0.594619	Het
715618786	BARC_1.01_Gm14_42648628_C_T	Chr14	41917321	0.561692	Het
715618886	BARC_1.01_Gm14_44146640_T_C	Chr14	43412535	0.575854	Het
715618891	BARC_1.01_Gm14_44186472_C_T	Chr14	43451170	0.575854	Het
715618894	BARC_1.01_Gm14_44193109_G_A	Chr14	43457807	0.575854	Het
715618902	BARC_1.01_Gm14_44283741_T_C	Chr14	43548260	0.616248	Het
715618903	BARC_1.01_Gm14_44293351_A_G	Chr14	43557868	0.578014	Het
715618905	BARC_1.01_Gm14_44297022_A_G	Chr14	43561539	0.57555	Het
715618908	BARC_1.01_Gm14_44308124_C_T	Chr14	43572822	0.597566	Het
715618909	BARC_1.01_Gm14_44308730_A_G	Chr14	43573428	0.624662	Het
715618911	BARC_1.01_Gm14_44311132_A_C	Chr14	43575830	0.615784	Het
715618913	BARC_1.01_Gm14_44318902_T_G	Chr14	43583600	0.578014	Het
715618915	BARC_1.01_Gm14_44333055_C_T	Chr14	43597753	0.578014	Het
715618917	BARC_1.01_Gm14_44339807_A_G	Chr14	43604766	0.613817	Het
715618918	BARC_1.01_Gm14_44341404_T_C	Chr14	43606363	0.573832	Het
715618932	BARC_1.01_Gm14_44469493_A_G	Chr14	43737419	0.639704	Eu
715618937	BARC_1.01_Gm14_44514325_C_T	Chr14	43782337	0.568951	Eu
715623122	BARC_1.01_Gm15_8263547_G_T	Chr15	8304621	0.639932	Eu
715623129	BARC_1.01_Gm15_8410101_A_G	Chr15	8451063	0.622965	Eu
715623130	BARC_1.01_Gm15_8412363_G_A	Chr15	8453325	0.622965	Eu
715623131	BARC_1.01_Gm15_8420844_G_A	Chr15	8461806	0.559052	Eu
715623133	BARC_1.01_Gm15_8474378_G_T	Chr15	8515399	0.609828	Eu
715623134	BARC_1.01_Gm15_8512905_A_G	Chr15	8554284	0.607669	Eu
715623136	BARC_1.01_Gm15_8537315_A_G	Chr15	8578689	0.568593	Eu
715623137	BARC_1.01_Gm15_8542175_A_G	Chr15	8583548	0.607697	Eu
715623138	BARC_1.01_Gm15_8551854_T_G	Chr15	8593227	0.568593	Eu
715623141	BARC_1.01_Gm15_8569535_T_C	Chr15	8610908	0.603702	Eu
715623142	BARC_1.01_Gm15_8579398_C_T	Chr15	8620771	0.67185	Eu
715623146	BARC_1.01_Gm15_8628372_C_T	Chr15	8671170	0.656947	Eu
715623147	BARC_1.01_Gm15_8630252_A_G	Chr15	8673050	0.583184	Eu
715623149	BARC_1.01_Gm15_8635614_A_G	Chr15	8678412	0.584431	Eu
715623159	BARC_1.01_Gm15_8697425_C_A	Chr15	8740226	0.639932	Eu
715623165	BARC_1.01_Gm15_8758604_C_T	Chr15	8801405	0.622303	Eu
715623187	BARC_1.01_Gm15_9025023_G_A	Chr15	9067087	0.558208	Eu
715623189	BARC_1.01_Gm15_9029517_C_A	Chr15	9071581	0.558208	Eu
715623190	BARC_1.01_Gm15_9035408_T_C	Chr15	9077472	0.558208	Eu
715623193	BARC_1.01_Gm15_9047986_A_G	Chr15	9090050	0.558208	Eu
715620438	BARC_1.01_Gm15_12373175_A_G	Chr15	12394047	0.557336	Eu
715620450	BARC_1.01_Gm15_12490330_C_A	Chr15	12511472	0.564489	Eu
715625030	BARC_1.01_Gm16_3800954_G_T	Chr16	3821993	0.599719	Eu
715623646	BARC_1.01_Gm16_19403439_T_C	Chr16	20909594	0.595331	Het
715623643	BARC_1.01_Gm16_19326072_T_C	Chr16	20986962	0.61003	Het
715623639	BARC_1.01_Gm16_19225813_C_T	Chr16	21087178	0.580306	Het
715624357	BARC_1.01_Gm16_30635386_G_A	Chr16	31003707	0.574445	Eu
715626483	BARC_1.01_Gm17_2415553_G_A	Chr17	2409261	0.568955	Eu
715626515	BARC_1.01_Gm17_2500016_T_C	Chr17	2492277	0.574314	Eu
715626516	BARC_1.01_Gm17_2500333_T_G	Chr17	2492594	0.597807	Eu
715628283	BARC_1.01_Gm17_8577724_G_A	Chr17	8306525	0.621169	Eu
715628290	BARC_1.01_Gm17_8618463_G_A	Chr17	8347263	0.596415	Eu
715628292	BARC_1.01_Gm17_8626494_G_A	Chr17	8355294	0.596415	Eu
715628293	BARC_1.01_Gm17_8635426_T_C	Chr17	8364226	0.634569	Eu
715628304	BARC_1.01_Gm17_8818072_A_C	Chr17	8547540	0.651376	Eu
715628305	BARC_1.01_Gm17_8827651_C_T	Chr17	8557119	0.652714	Eu
715628307	BARC_1.01_Gm17_8835251_G_A	Chr17	8564719	0.599551	Eu
715628308	BARC_1.01_Gm17_8837014_T_C	Chr17	8566482	0.682965	Eu
715628319	BARC_1.01_Gm17_8956091_G_A	Chr17	8685557	0.600845	Eu
715630850	BARC_1.01_Gm18_4820361_G_T	Chr18	4837122	0.568582	Eu
715633487	BARC_1.01_Gm19_2408768_T_G	Chr19	2455027	0.561542	Eu
715634133	BARC_1.01_Gm19_3416538_A_G	Chr19	3447202	0.616311	Eu
715635036	BARC_1.01_Gm19_40594861_T_C	Chr19	40787533	0.653652	Eu
715635038	BARC_1.01_Gm19_40608982_C_T	Chr19	40801654	0.653652	Eu
715635043	BARC_1.01_Gm19_40662679_G_T	Chr19	40855351	0.570115	Eu
715635044	BARC_1.01_Gm19_40663220_A_G	Chr19	40855892	0.5663	Eu
715635067	BARC_1.01_Gm19_40771881_C_T	Chr19	40964536	0.684645	Eu
715635070	BARC_1.01_Gm19_40783256_T_C	Chr19	40975911	0.649968	Eu
715635074	BARC_1.01_Gm19_40839697_T_C	Chr19	41032352	0.574454	Eu
715635077	BARC_1.01_Gm19_40878537_A_G	Chr19	41071216	0.627719	Eu
715635078	BARC_1.01_Gm19_40883439_T_C	Chr19	41076118	0.60741	Eu
715635079	BARC_1.01_Gm19_40884097_A_G	Chr19	41076776	0.60741	Eu
715635080	BARC_1.01_Gm19_40885820_T_C	Chr19	41078499	0.60741	Eu
715635082	BARC_1.01_Gm19_40901492_A_G	Chr19	41094171	0.63858	Eu
715635089	BARC_1.01_Gm19_41005684_C_T	Chr19	41198389	0.561778	Eu
715635092	BARC_1.01_Gm19_41013395_C_T	Chr19	41206096	0.57782	Eu
715638154	BARC_1.01_Gm20_40166186_C_A	Chr20	41288533	0.592027	Eu
715638175	BARC_1.01_Gm20_40486756_A_G	Chr20	41604248	0.608906	Eu
715638181	BARC_1.01_Gm20_40551213_T_C	Chr20	41668695	0.693014	Eu
715638182	BARC_1.01_Gm20_40572072_G_A	Chr20	41689555	0.670545	Eu
715638184	BARC_1.01_Gm20_40580650_T_G	Chr20	41698131	0.659012	Eu
715638185	BARC_1.01_Gm20_40583992_C_A	Chr20	41701473	0.715959	Eu
715638283	BARC_1.01_Gm20_41309251_G_A	Chr20	42426240	0.613448	Eu
715638285	BARC_1.01_Gm20_41311297_A_G	Chr20	42428286	0.6203	Eu
SNP position based on Wm82a2.v1

## Sheet: Sheet1
	FST P-value	1-FST quantile	alleles	chrom	pos	rs#				Obs FST
	0.390599	0.390599	C/T	7	3084403	715597105	BARC_1.01_Gm07_3084403_T_C	Chr07	3104282	0.558263
	0.390599	0.390599	G/A	7	3107698	715597117	BARC_1.01_Gm07_3107698_A_G	Chr07	3127577	0.558263
	0.223475	0.223475	A/G	15	9025023	715623187	BARC_1.01_Gm15_9025023_G_A	Chr15	9067087	0.558208
	0.223475	0.223475	A/C	15	9029517	715623189	BARC_1.01_Gm15_9029517_C_A	Chr15	9071581	0.558208
	0.223475	0.223475	C/T	15	9035408	715623190	BARC_1.01_Gm15_9035408_T_C	Chr15	9077472	0.558208
	0.223475	0.223475	G/A	15	9047986	715623193	BARC_1.01_Gm15_9047986_A_G	Chr15	9090050	0.558208
	0.308228	0.308228	G/A	15	12373175	715620438	BARC_1.01_Gm15_12373175_A_G	Chr15	12394047	0.557336
